# Supplementary material
Source: PubMed Central journal article supplement (PMC9833192)
Supplement: Figure_1_Simplified_Chronic_Pain_Guideline.pdf [file Figure_1_Simplified_Chronic_Pain_Guideline.pdf]

Figure 1

# PEER Simplified Chronic Pain Guideline: Summary

## Treatment Interventions for Discussion with Patients

### Physical Activity

The foundation of a treatment plan for chronic low back pain and osteoarthritis is physical activity.

About 2 in every 3 people who increase their activity will have improved pain independent of weight loss.

✓ Patients can choose the activity they enjoy: one type of exercise is not better than another!

✓ A wearable activity tracker and an exercise prescription can help to increase physical activity.

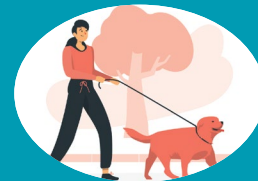

### Psychological Therapy

About 30-60% of patients with chronic pain will get pain improvement with cognitive behavioral therapy (CBT) or mindfulness-based stress reduction compared to 10-30% with control (e.g. wait list or no intervention).

### Treatment Options

Percentage of patients who will have pain meaningfully reduced ( $\geq 30\%$ ):

|                                                      | OSTEOARTHRITIS                                                                                                | CHRONIC LOW BACK PAIN                                                                   | NEUROPATHIC PAIN                                                                    |
|------------------------------------------------------|---------------------------------------------------------------------------------------------------------------|-----------------------------------------------------------------------------------------|-------------------------------------------------------------------------------------|
| Foundation of treatment                              | Physical activity is the foundation of a treatment plan for osteoarthritis and chronic low back pain.         |                                                                                         |                                                                                     |
| Add-on option                                        | Psychological therapy is an option for patients with any of these conditions.                                 |                                                                                         |                                                                                     |
|                                                      | Placebo or control: 40%<br>                                                                                   | Placebo or control: 40%<br>                                                             | Placebo or control: 29%<br>                                                         |
| Additional treatments with clear evidence of benefit | Intra-articular corticosteroids: 70%<br><br>SNRIs: 61%<br><br>Oral NSAIDs: 58%<br><br>Topical NSAIDs: 51%<br> | Oral NSAIDs: 58%<br><br>Spinal manipulation: 55%<br><br>TCAs: 53%<br><br>SNRIs: 50%<br> | Gabapentinoids: 44%<br><br>SNRIs: 42%<br><br>Rubefacients (e.g. capsaicin): 40%<br> |
| Treatments with unclear benefit                      | Glucosamine<br>Chondroitin<br>Viscosupplementation                                                            | Acupuncture<br>Rubefacients (e.g. capsaicin)                                            | TCAs<br>Cannabinoids<br>Topical nitrates                                            |
| Treatments with evidence of no benefit               | Acetaminophen                                                                                                 | Corticosteroids (epidural)                                                              | Acupuncture<br>Topical ketamine, amitriptyline,<br>doxepin or combinations          |
| Treatments with harms that exceed benefit            | Opioids<br>Cannabinoids                                                                                       | Opioids<br>Cannabinoids                                                                 | Opioids<br>Topiramate<br>Oxcarbazepine                                              |

For more information, see <https://pain-calculator.com>.

No responder analyses identified for: osteoarthritis (rubefacients, platelet-rich plasma injections, TCAs), low back pain (acetaminophen, muscle relaxants, SSRIs, anticonvulsants, topical NSAIDs), neuropathic pain (exercise and lidocaine).

# PEER Simplified Chronic Pain Guideline: Summary

## Key Adverse Effects

| TREATMENTS                                                  | PERCENTAGE STOPPING DUE TO ADVERSE EFFECTS             | KEY ADVERSE EFFECTS TO DISCUSS WITH PATIENT                                                                                                                                           | COST <sup>1</sup> (3-MONTH)            |
|-------------------------------------------------------------|--------------------------------------------------------|---------------------------------------------------------------------------------------------------------------------------------------------------------------------------------------|----------------------------------------|
| Placebo                                                     | ~5% (2-9%)                                             | --                                                                                                                                                                                    | --                                     |
| Acetaminophen                                               | <b>Not statistically worse than placebo or control</b> | Liver damage in overdose                                                                                                                                                              | \$25-50                                |
| Acupuncture                                                 |                                                        | Not reported                                                                                                                                                                          | \$150-300+                             |
| Chondroitin or glucosamine                                  |                                                        | None reported as greater than placebo                                                                                                                                                 | <\$50                                  |
| Corticosteroids (intra-articular or other injections)       |                                                        | Infection (one in ~50,000) <sup>2</sup> ; post-dural puncture headache with spinal injection                                                                                          | \$25-50                                |
| Physical activity                                           |                                                        | Mild muscle soreness                                                                                                                                                                  | \$0-500+                               |
| NSAIDs (topical)                                            | <b>6%</b>                                              | Application site reactions                                                                                                                                                            | \$50-75                                |
| Rubefacients (e.g., capsaicin)                              | <b>6%</b>                                              | Local burning, skin redness                                                                                                                                                           | \$50-75                                |
| Cannabinoids                                                | <b>10%</b>                                             | Dizziness, nausea, drowsiness, confusion                                                                                                                                              | \$150-300+                             |
| Gabapentinoids                                              | <b>12%</b>                                             | Dizziness, peripheral edema, weight gain                                                                                                                                              | <\$50-150                              |
| SNRIs                                                       | <b>12%</b>                                             | Dizziness, sedation, stomach upset, weight loss                                                                                                                                       | <\$50-300                              |
| TCA's                                                       | <b>16%</b>                                             | Dry mouth, dizziness, drowsiness                                                                                                                                                      | \$25-150                               |
| Opioids                                                     | <b>27%</b>                                             | Sedation, dizziness, constipation, pruritis, vomiting, nausea, dependency, overdose                                                                                                   | \$75-300                               |
| NSAIDs (oral)                                               | <b>Not reported</b>                                    | Stomach upset, gastrointestinal bleeds, increased blood pressure, worsening kidney problems, new or worsening heart failure; increased risk of myocardial infarction with some NSAIDs | \$50-100                               |
| Psychological Therapy                                       |                                                        | Not reported                                                                                                                                                                          | Variable                               |
| Spinal manipulation                                         |                                                        | Case reports have associated neck manipulation with stroke. <sup>3</sup>                                                                                                              | \$150-300+                             |
| Topical agents (nitrates, amitriptyline, ketamine, doxepin) |                                                        | Local reactions;<br>Nitrates: headache, palpitations possible                                                                                                                         | Nitrates: <\$25;<br>Others: \$175-300+ |
| Viscosupplementation                                        |                                                        | Injection site reactions                                                                                                                                                              | \$150-300+                             |

**References:** 1) Prescription drug costs taken from <https://pricingdoc.acfp.ca> and <https://www.mckesson.ca>. 2) Jones T, Kelsberg G, Safranek S. Am Fam Physician. 2014; 90: 115-6. 3) Nielsen SM, Tarp S, Christensen R, Bliddal H, Klokke L, Henriksen M. Syst Rev 2017; 6(1): 64. Illustrations by Storyset: <https://storyset.com/>

### Practice Points

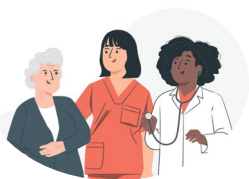

- Physical Activity Prescriptions available from RxFiles (<https://bit.ly/ExerciseRxFiles>)
- Adding a second drug is reasonable when the initial agent provides a partial benefit
- Goals of treatment should be patient-identified, realistic and focused on functional outcomes
- Start/titrate/taper/stop one medication at a time to allow for accurate monitoring of response or adverse effects

NSAIDs = non-steroid anti-inflammatory drugs; SNRIs = serotonin norepinephrine reuptake inhibitors; TCAs = tricyclic antidepressants
